# Supplementary material
Source: MDPI journal article supplement (https://www.mdpi.com/2075-4698/9/1/11)
Supplement: s1 [file s1]

# Supplemental Material

## **Perceptual Knots and Black Identity Politics: Linked Fate, American Heritage, and Support for Trump Era Immigration Policy**

Last Updated:

January 25, 2019

**Table A1.** Percentage of Blacks Selecting ‘Immigration’ as Most Important Problem Facing Blacks and Percentage Selecting ‘Immigration’ in Combination with Another MIP

| Most Important Problem<br><i>Problem</i>      | Selection |      | In Combination |       |
|-----------------------------------------------|-----------|------|----------------|-------|
|                                               | No        | Yes  | No             | Yes   |
| Immigration Reform                            | 95.5      | 4.5  | ---            | ---   |
| Job creation / improve economy                | 75.3      | 24.7 | 99.60          | 0.40  |
| Wages / Incomes / Minimum wage                | 74.7      | 25.3 | 99.66          | 0.34  |
| K-12 education / schools                      | 91.2      | 8.8  | 99.74          | 0.26  |
| Health care                                   | 71.7      | 28.3 | 99.23          | 0.77  |
| Terrorism / ISIS / foreign policy             | 90.3      | 9.7  | 99.13          | 0.87  |
| Housing / affordable housing                  | 85.8      | 14.2 | 99.77          | 0.23  |
| College affordability                         | 92.1      | 7.9  | 99.88          | 0.12  |
| Corruption in government / special interests  | 92.7      | 7.3  | 99.91          | 0.09  |
| Racism and race relations                     | 72.4      | 27.6 | 99.57          | 0.43  |
| Climate change / global warming / environment | 96.0      | 4.0  | 99.83          | 0.17  |
| Abortion / women’s reproductive health        | 96.9      | 3.1  | 99.80          | 0.20  |
| Taxes / government spending                   | 92.6      | 7.4  | 99.83          | 0.17  |
| Criminal justice reform / police issues       | 86.9      | 13.1 | 99.67          | 0.33  |
| Something Else                                | 97.0      | 3.0  | 99.60          | 0.40  |
| <i>Other Combinations Selected</i>            | ---       | ---  | 4.36           | 95.64 |
| <i>N =</i>                                    | 3097      |      |                |       |

Notes: Respondents were asked, “On the whole, what are the most important issues facing your community that you think the President and Congress should address?” [MAY SELECT ONE OR TWO]. Response options were randomized.

Source: 2016 CMPS (weighted)

**Table A2.** Partial Proportional Odds Model for Position on Border Security Funding

| <i>Variable</i>                        | <i>DV: 1 = Decrease, 2 = Stay the Same, 3 = Increase</i> |                            |
|----------------------------------------|----------------------------------------------------------|----------------------------|
|                                        | Decrease                                                 | Stay the Same              |
| Experimental Cue: Illegal              | 1.074<br>(0.66)                                          | 1.074<br>(0.66)            |
| Anti-Latino: Cultural Isolation        | 1.014*<br>(2.37)                                         | 1.014*<br>(2.37)           |
| <b>Anti-Latino: Social Deviance</b>    | <b>1.024**<br/>(2.89)</b>                                | <b>1.051***<br/>(8.13)</b> |
| Black Linked Fate                      | 0.769+<br>(-1.88)                                        | 0.769+<br>(-1.88)          |
| Economic Anxiety                       | 0.961<br>(-0.87)                                         | 0.961<br>(-0.87)           |
| Age                                    | 1.022***<br>(5.06)                                       | 1.022***<br>(5.06)         |
| Education                              | 0.940<br>(-1.01)                                         | 0.940<br>(-1.01)           |
| Female                                 | 1.033<br>(0.29)                                          | 1.033<br>(0.29)            |
| Ideology (5= Very Conservative)        | 1.169**<br>(2.96)                                        | 1.169**<br>(2.96)          |
| Partisanship (7 = Strong Republican)   | 1.041<br>(0.94)                                          | 1.041<br>(0.94)            |
| Household Income                       | 1.003<br>(0.15)                                          | 1.003<br>(0.15)            |
| Heritage: American Roots               | 0.848<br>(-1.31)                                         | 0.848<br>(-1.31)           |
| Region 2: North East, Middle Atlantic  | 0.940<br>(-0.18)                                         | 0.940<br>(-0.18)           |
| Region 3: Midwest, East North Central  | 1.069<br>(0.19)                                          | 1.069<br>(0.19)            |
| Region 4: Midwest, West North Central  | 0.920<br>(-0.19)                                         | 0.920<br>(-0.19)           |
| <b>Region 5: South, South Atlantic</b> | <b>1.042<br/>(0.12)</b>                                  | <b>0.693<br/>(-1.09)</b>   |
| Region 6: South, East South Central    | 0.861<br>(-0.40)                                         | 0.861<br>(-0.40)           |
| Region 7: South, West South Central    | 0.961<br>(-0.11)                                         | 0.961<br>(-0.11)           |
| Region 8: West, Mountain               | 0.564<br>(-1.29)                                         | 0.564<br>(-1.29)           |
| Region 9: West, Pacific                | 0.901<br>(-0.29)                                         | 0.901<br>(-0.29)           |
| Registered (1 = Yes)                   | 0.821<br>(-1.28)                                         | 0.821<br>(-1.28)           |
| <b>Local Police (4 = Poor Job)</b>     | <b>0.656***<br/>(-4.19)</b>                              | <b>0.954<br/>(-0.61)</b>   |
| Perceived Percent of Latinos           | 1.589<br>(1.41)                                          | 1.589<br>(1.41)            |
| Zip-Code Economic Distress             | 1.001<br>(0.46)                                          | 1.001<br>(0.46)            |
| Pseudo R <sup>2</sup>                  | 0.068                                                    |                            |
| Log Pseudolikelihood                   | -1867.4523                                               |                            |
| Number of Observations                 | 2,106                                                    |                            |
| Wald chi <sup>2</sup> (27)             | 193.26                                                   |                            |

Notes: Region 1: North East, New England (excluded baseline). *gologit2* is a generalized ordered logit. Our model relaxes the constraint for variables used in the Constraints Model of Table 3 which were found to have violated the proportional odds/parallel lines assumptions: Social Deviance, Local Police, and Census 5. Highlighted areas indicate difference. Other variables constrained to have their effects meet said assumption. Interpretation is similar to a series of binary logistic regression. Results are not dissimilar from Table 3.

Source: 2016 CMPS, Black Sample (weighted)

+  $p < 0.10$ , \*  $p < 0.05$ , \*\*  $p < .01$ , \*\*\*  $p < .001$

**Table A3.** Partial Proportional Odds Model for Position on Immigrants Take from Natives

| <i>Variable</i>                        | <i>DV: 1 = Strongly Disagree to 4 = Strongly Agree</i> |                           |                          |
|----------------------------------------|--------------------------------------------------------|---------------------------|--------------------------|
|                                        | Strongly Disagree                                      | Somewhat Disagree         | Somewhat Agree           |
| Anti-Latino: Cultural Isolation        | 1.031***<br>(4.47)                                     | 1.031***<br>(4.47)        | 1.031***<br>(4.47)       |
| Anti-Latino: Social Deviance           | 1.120***<br>(17.23)                                    | 1.120***<br>(17.23)       | 1.120***<br>(17.23)      |
| Black Linked Fate                      | 1.323+<br>(1.93)                                       | 1.323+<br>(1.93)          | 1.323+<br>(1.93)         |
| Economic Anxiety                       | 1.116*<br>(2.42)                                       | 1.116*<br>(2.42)          | 1.116*<br>(2.42)         |
| Age                                    | 1.008*<br>(2.10)                                       | 1.008*<br>(2.10)          | 1.008*<br>(2.10)         |
| Education                              | 0.841**<br>(-2.91)                                     | 0.841**<br>(-2.91)        | 0.841**<br>(-2.91)       |
| Female                                 | 0.986<br>(-0.14)                                       | 0.986<br>(-0.14)          | 0.986<br>(-0.14)         |
| Ideology (5= Very Conservative)        | 1.073<br>(1.19)                                        | 1.073<br>(1.19)           | 1.073<br>(1.19)          |
| Partisanship (7 = Strong Republican)   | 1.049<br>(1.03)                                        | 1.049<br>(1.03)           | 1.049<br>(1.03)          |
| Household Income                       | 0.972<br>(-1.59)                                       | 0.972<br>(-1.59)          | 0.972<br>(-1.59)         |
| <b>Heritage: American Roots</b>        | <b>2.022***<br/>(4.24)</b>                             | <b>1.458**<br/>(2.59)</b> | <b>1.223<br/>(0.94)</b>  |
| Region 2: North East, Middle Atlantic  | 0.733<br>(-1.02)                                       | 0.733<br>(-1.02)          | 0.733<br>(-1.02)         |
| Region 3: Midwest, East North Central  | 0.911<br>(-0.30)                                       | 0.911<br>(-0.30)          | 0.911<br>(-0.30)         |
| Region 4: Midwest, West North Central  | 1.859<br>(1.63)                                        | 1.859<br>(1.63)           | 1.859<br>(1.63)          |
| <b>Region 5: South, South Atlantic</b> | <b>0.730<br/>(-1.03)</b>                               | <b>0.504*<br/>(-2.29)</b> | <b>0.701<br/>(-1.11)</b> |
| Region 6: South, East South Central    | 0.581<br>(-1.44)                                       | 0.581<br>(-1.44)          | 0.581<br>(-1.44)         |
| Region 7: South, West South Central    | 1.288<br>(0.81)                                        | 1.288<br>(0.81)           | 1.288<br>(0.81)          |
| Region 8: West, Mountain               | 1.095<br>(0.23)                                        | 1.095<br>(0.23)           | 1.095<br>(0.23)          |
| Region 9: West, Pacific                | 1.090<br>(0.27)                                        | 1.090<br>(0.27)           | 1.090<br>(0.27)          |
| Registered (1 = Yes)                   | 1.862***<br>(4.27)                                     | 1.862***<br>(4.27)        | 1.862***<br>(4.27)       |
| Local Police (4 = Poor Job)            | 1.089<br>(1.26)                                        | 1.089<br>(1.26)           | 1.089<br>(1.26)          |
| Perceived Percent of Latinos           | 0.748<br>(-0.90)                                       | 0.748<br>(-0.90)          | 0.748<br>(-0.90)         |
| Zip-Code Economic Distress             | 1.003+<br>(1.65)                                       | 1.003+<br>(1.65)          | 1.003+<br>(1.65)         |
| Pseudo R <sup>2</sup>                  | 0.155                                                  |                           |                          |
| Log Pseudolikelihood                   | -2437.5216                                             |                           |                          |
| Number of Observations                 | 2106                                                   |                           |                          |
| Wald chi <sup>2</sup> (27)             | 532.72                                                 |                           |                          |

Notes: Region 1: North East, New England (excluded baseline). *gologit2* is a generalized ordered logit. Our model relaxes the constraint for variables used in the Constraints Model of Table 4 which were found to have violated the proportional odds/parallel lines assumptions: Heritage and Census 5. Highlighted areas indicate difference. Other variables constrained to have their effects meet said assumption. Interpretation is similar to a series of binary logistic regression. Results are not dissimilar from Table 4. The results however do suggest that respondents in the South Atlantic region were especially unlikely to agree that immigrants take from native born Americans.

Source: 2016 CMPS, Black Sample (weighted)

+  $p < 0.10$ , \*  $p < 0.05$ , \*\*  $p < .01$ , \*\*\*  $p < .001$

**Table A3.** Partial Proportional Odds Model for Position on Advocacy for Black Undocumented

| <i>Variable</i>                       | <i>DV: 1 = Not at All Important, 2 = Somewhat Important, 3 = Very Important</i> |                     |
|---------------------------------------|---------------------------------------------------------------------------------|---------------------|
|                                       | Not at All Important                                                            | Somewhat Important  |
| Anti-Latino: Cultural Isolation       | 0.974***<br>(-3.73)                                                             | 0.974***<br>(-3.73) |
| Anti-Latino: Social Deviance          | 0.982**<br>(-3.07)                                                              | 0.982**<br>(-3.07)  |
| Black Linked Fate                     | 1.599***<br>(3.31)                                                              | 1.599***<br>(3.31)  |
| Economic Anxiety                      | 0.972<br>(-0.60)                                                                | 0.972<br>(-0.60)    |
| Age                                   | 1.006<br>(0.93)                                                                 | 0.991*<br>(-2.15)   |
| Education                             | 1.007<br>(0.11)                                                                 | 1.007<br>(0.11)     |
| Female                                | 1.144<br>(1.21)                                                                 | 1.144<br>(1.21)     |
| Ideology (5= Very Conservative)       | 0.941<br>(-1.01)                                                                | 0.941<br>(-1.01)    |
| Partisanship (7 = Strong Republican)  | 0.914+<br>(-1.90)                                                               | 0.914+<br>(-1.90)   |
| Household Income                      | 0.974<br>(-1.39)                                                                | 0.974<br>(-1.39)    |
| Heritage: American Roots              | 0.871<br>(-1.07)                                                                | 0.871<br>(-1.07)    |
| Region 2: North East, Middle Atlantic | 0.942<br>(-0.18)                                                                | 0.942<br>(-0.18)    |
| Region 3: Midwest, East North Central | 0.807<br>(-0.60)                                                                | 0.807<br>(-0.60)    |
| Region 4: Midwest, West North Central | 0.859<br>(-0.38)                                                                | 0.859<br>(-0.38)    |
| Region 5: South, South Atlantic       | 0.833<br>(-0.55)                                                                | 0.833<br>(-0.55)    |
| Region 6: South, East South Central   | 0.678<br>(-1.02)                                                                | 0.678<br>(-1.02)    |
| Region 7: South, West South Central   | 0.800<br>(-0.64)                                                                | 0.800<br>(-0.64)    |
| Region 8: West, Mountain              | 0.805<br>(-0.51)                                                                | 0.805<br>(-0.51)    |
| Region 9: West, Pacific               | 0.569<br>(-1.18)                                                                | 1.201<br>(0.49)     |
| Registered (1 = Yes)                  | 0.718*<br>(-2.26)                                                               | 0.718*<br>(-2.26)   |
| Local Police (4 = Poor Job)           | 0.988<br>(-0.17)                                                                | 0.988<br>(-0.17)    |
| Perceived Percent of Latinos          | 1.634<br>(1.31)                                                                 | 1.634<br>(1.31)     |
| Zip-Code Economic Distress            | 1.001<br>(0.60)                                                                 | 1.001<br>(0.60)     |
| Pseudo R <sup>2</sup>                 | 0.036                                                                           |                     |
| Log Pseudolikelihood                  | -1884.527                                                                       |                     |
| Number of Observations                | 2160                                                                            |                     |
| Wald chi <sup>2</sup> (25)            | 83.60                                                                           |                     |

Notes: Region 1: North East, New England (excluded baseline). *gologit2* is a generalized ordered logit. Our model relaxes the constraint for variables used in the Constraints Model of Table 5 which were found to have violated the proportional odds/parallel lines assumptions: Age and Census 9. Highlighted areas indicate difference. Other variables constrained to have their effects meet said assumptions. Interpretation is similar to a series of binary logistic regression. Results are not dissimilar from Table 5. However age was significant, meaning that the effect of higher levels of age was to make respondents less likely to select the “very important” response option.

Source: 2016 CMPS, Black Sample (weighted)

+  $p < 0.10$ , \*  $p < 0.05$ , \*\*  $p < .01$ , \*\*\*  $p < .001$
